# Supplementary material
Source: PubMed Central journal article supplement (PMC3642230)

**A**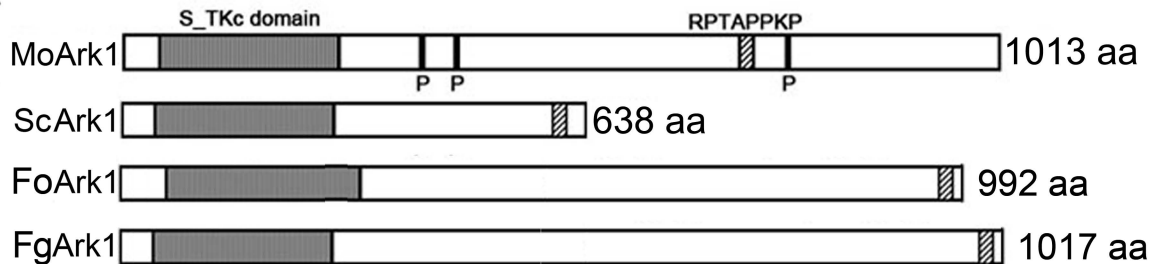**B**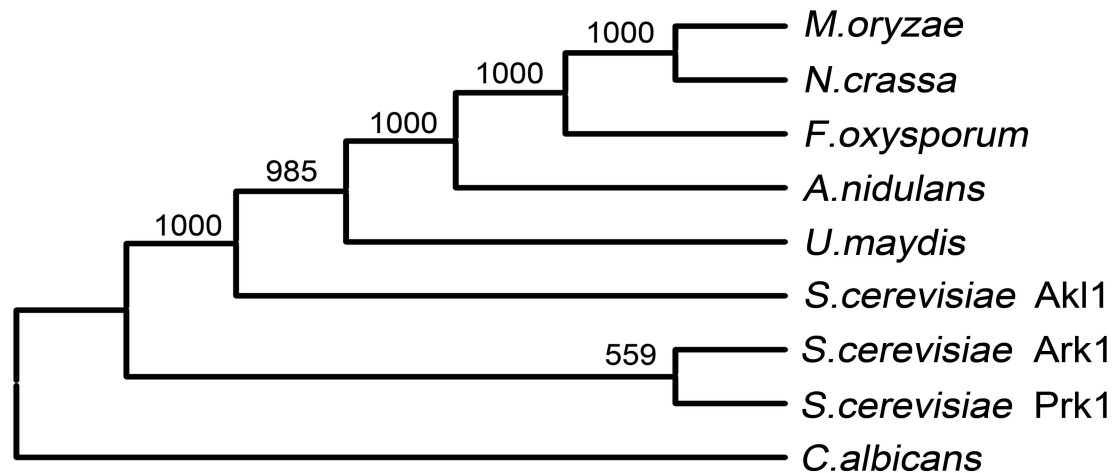

**A**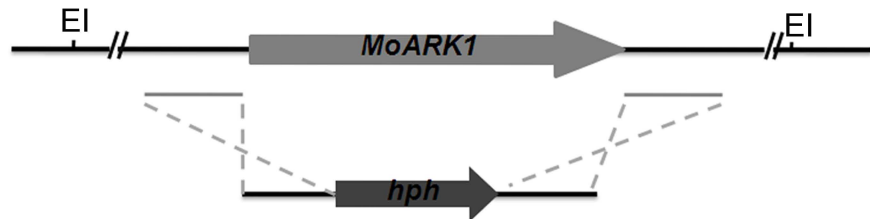**B**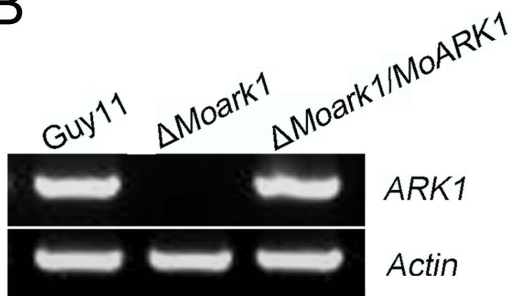**C**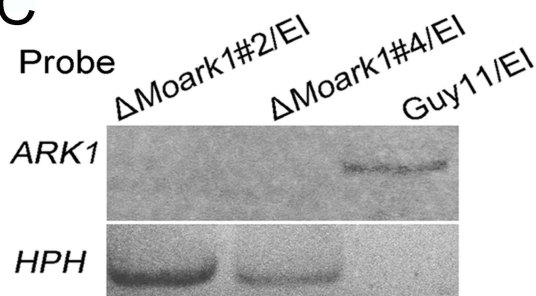

**A**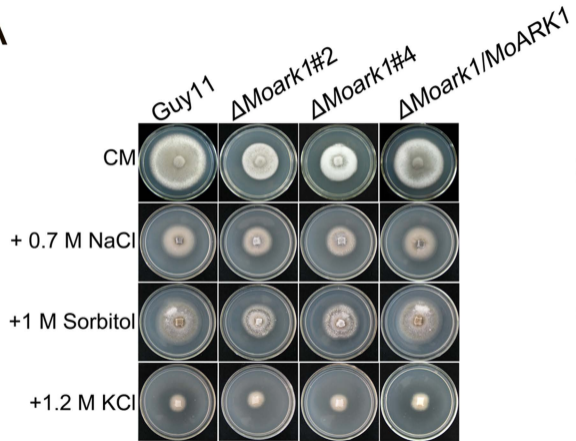**B**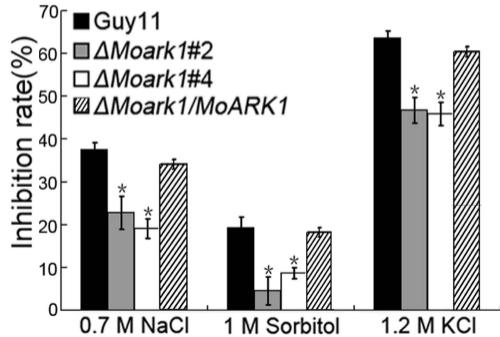

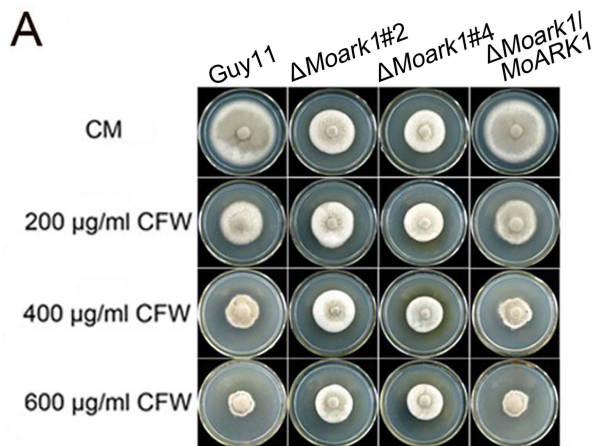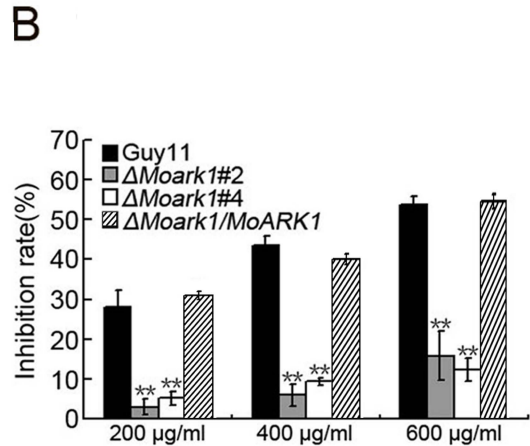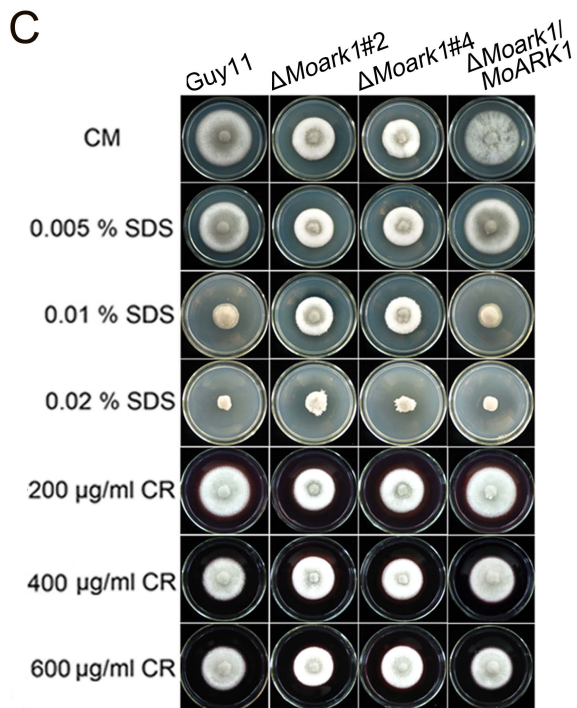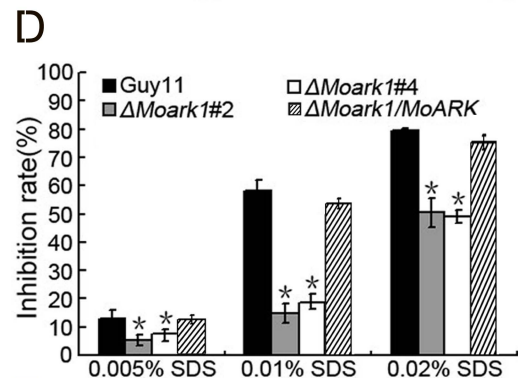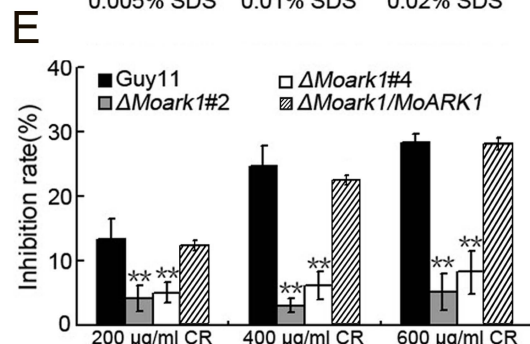

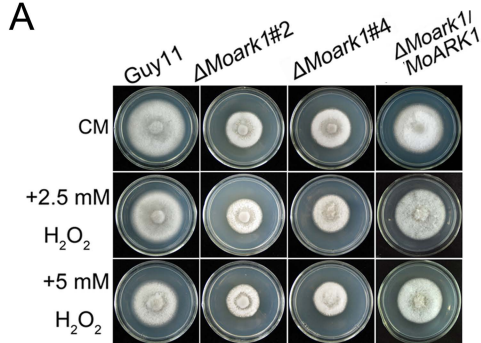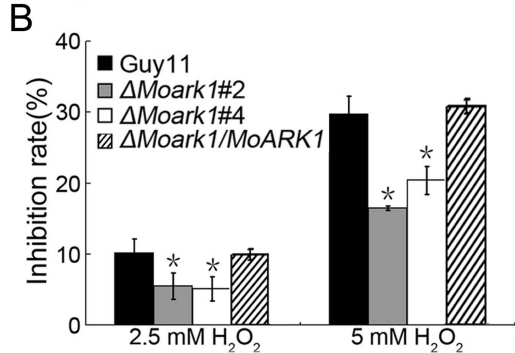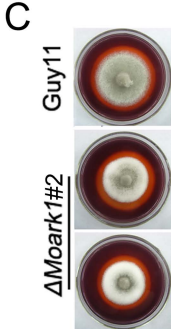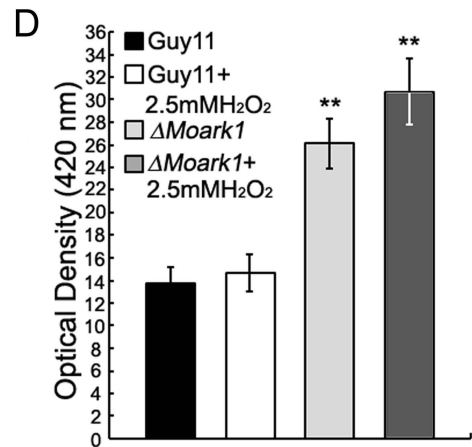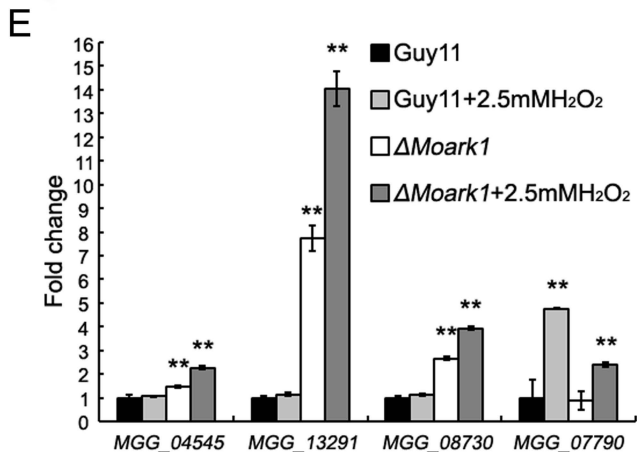

Supplement: NIHMS438059-supplement-Supp_Fig_S1-S5.pdf [file NIHMS438059-supplement-Supp_Fig_S1-S5.pdf]
